# Supplementary material for: New Perspectives in Dried Blood Spot Biomarkers for Lysosomal Storage Diseases
Source: MDPI journal article supplement (doi:10.3390/ijms241210177), 2023-06-15
Supplement: s1 [file s1]

**Table S2.** Mass transitions and conditions for all internal standards and compounds used in this study. CMH = ceramide monohexoside, CDH ceramide dihexoside, SM = sphingomyelin.

All standards were purchased from Matreya LLC

| Run 1                                             |                                                   |                 |            |            |
|---------------------------------------------------|---------------------------------------------------|-----------------|------------|------------|
| Compound                                          | Internal Standard                                 | Transition      | Cone Volt. | Col.Energy |
| Lyso-Gb1-28                                       | <sup>13</sup> C <sub>6</sub> Glucosyl-sphingosine | 434.37 > 236.32 | 92         | 12         |
| Lyso-Gb1-12                                       | <sup>13</sup> C <sub>6</sub> Glucosyl-sphingosine | 450.44 > 252.38 | 92         | 12         |
| Lyso-Gb1-2                                        | <sup>13</sup> C <sub>6</sub> Glucosyl-sphingosine | 460.39 > 262.33 | 92         | 12         |
| Lyso-Gb1                                          | <sup>13</sup> C <sub>6</sub> Glucosyl-sphingosine | 462.41 > 264.35 | 92         | 12         |
| Lyso-Gb1                                          | <sup>13</sup> C <sub>6</sub> Glucosyl-sphingosine | 462.41 > 282.36 | 92         | 16         |
| <sup>13</sup> C <sub>6</sub> Glucosyl-sphingosine | n/a                                               | 468.41 > 264.35 | 92         | 20         |
| <sup>13</sup> C <sub>6</sub> Glucosyl-sphingosine | n/a                                               | 468.41 > 282.36 | 92         | 20         |
| Lyso-Gb1+14                                       | <sup>13</sup> C <sub>6</sub> Glucosyl-sphingosine | 476.4 > 278.34  | 92         | 12         |
| Lyso-Gb1+16                                       | <sup>13</sup> C <sub>6</sub> Glucosyl-sphingosine | 478.4 > 280.34  | 92         | 12         |
| Lyso-Gb1+34                                       | <sup>13</sup> C <sub>6</sub> Glucosyl-sphingosine | 496.41 > 298.36 | 92         | 12         |
| Lyso-Gb1+50                                       | <sup>13</sup> C <sub>6</sub> Glucosyl-sphingosine | 512.4 > 314.34  | 92         | 12         |
| Lyso-CDH-28                                       | <sup>13</sup> C <sub>6</sub> Glucosyl-sphingosine | 596.43 > 236.32 | 92         | 12         |
| Lyso-CDH-12                                       | <sup>13</sup> C <sub>6</sub> Glucosyl-sphingosine | 612.49 > 252.38 | 92         | 12         |
| Lyso-CDH-2                                        | <sup>13</sup> C <sub>6</sub> Glucosyl-sphingosine | 622.44 > 262.33 | 92         | 12         |
| Lyso-CDH                                          | <sup>13</sup> C <sub>6</sub> Glucosyl-sphingosine | 624.46 > 264.35 | 92         | 12         |
| Lyso-CDH                                          | <sup>13</sup> C <sub>6</sub> Glucosyl-sphingosine | 624.46 > 282.36 | 92         | 16         |
| Lyso-CDH+14                                       | <sup>13</sup> C <sub>6</sub> Glucosyl-sphingosine | 638.45 > 278.34 | 92         | 12         |
| Lyso-CDH+16                                       | <sup>13</sup> C <sub>6</sub> Glucosyl-sphingosine | 640.46 > 280.34 | 92         | 12         |
| Lyso-CDH+34                                       | <sup>13</sup> C <sub>6</sub> Glucosyl-sphingosine | 658.47 > 298.36 | 92         | 12         |
| Lyso-CDH+50                                       | <sup>13</sup> C <sub>6</sub> Glucosyl-sphingosine | 674.45 > 314.34 | 92         | 12         |
| Compound                                          | Internal Standard                                 | Transition      | Cone Volt. | Col.Energy |
| CMH_C16:0                                         | N-omega-CD3-Octadecanoyl-ceramide trihexoside     | 722.48 > 560.51 | 125        | 42         |
| CMH_C18:0                                         | N-omega-CD3-Octadecanoyl-ceramide trihexoside     | 750.53 > 588.56 | 125        | 42         |
| CMH_C20:0                                         | N-omega-CD3-Octadecanoyl-ceramide trihexoside     | 778.59 > 616.62 | 125        | 42         |
| CMH_C22:1                                         | N-omega-CD3-Octadecanoyl-ceramide trihexoside     | 804.62 > 642.65 | 125        | 42         |
| CMH_C22:0                                         | N-omega-CD3-Octadecanoyl-ceramide trihexoside     | 806.64 > 644.67 | 125        | 42         |
| CMH_C24:2                                         | N-omega-CD3-Octadecanoyl-ceramide trihexoside     | 830.66 > 668.69 | 125        | 42         |
| CMH_C24:1                                         | N-omega-CD3-Octadecanoyl-ceramide trihexoside     | 832.68 > 670.71 | 125        | 42         |
| CMH_C24:0                                         | N-omega-CD3-Octadecanoyl-ceramide trihexoside     | 834.69 > 672.72 | 125        | 42         |
| CMH_C24:2-OH                                      | N-omega-CD3-Octadecanoyl-ceramide trihexoside     | 846.65 > 684.68 | 125        | 42         |
| CMH_C24:1-OH                                      | N-omega-CD3-Octadecanoyl-ceramide trihexoside     | 848.67 > 686.70 | 125        | 42         |
| CMH_C24:0-OH                                      | N-omega-CD3-Octadecanoyl-ceramide trihexoside     | 850.69 > 688.72 | 125        | 42         |
| CMH_C26:0                                         | N-omega-CD3-Octadecanoyl-ceramide trihexoside     | 862.74 > 700.78 | 125        | 42         |

|                                                   |                                                   |                   |                   |                   |
|---------------------------------------------------|---------------------------------------------------|-------------------|-------------------|-------------------|
| N-omega-CD3-Octadecanoyl-ceramide trihexoside     | n/a                                               | 1077.84 > 915.91  | 108               | 56                |
| Gb4_C16:0                                         | N-omega-CD3-Octadecanoyl-ceramide trihexoside     | 1249.44 > 1046.46 | 125               | 52                |
| Gb4_C18:1                                         | N-omega-CD3-Octadecanoyl-ceramide trihexoside     | 1275.47 > 1072.50 | 125               | 52                |
| Gb4_C18:0                                         | N-omega-CD3-Octadecanoyl-ceramide trihexoside     | 1277.49 > 1074.51 | 125               | 52                |
| Gb4_C20:1                                         | N-omega-CD3-Octadecanoyl-ceramide trihexoside     | 1303.53 > 1100.55 | 125               | 52                |
| Gb4_C20:0                                         | N-omega-CD3-Octadecanoyl-ceramide trihexoside     | 1305.54 > 1102.56 | 125               | 52                |
| Gb4_C22:1                                         | N-omega-CD3-Octadecanoyl-ceramide trihexoside     | 1331.58 > 1128.60 | 125               | 52                |
| Gb4_C22:0                                         | N-omega-CD3-Octadecanoyl-ceramide trihexoside     | 1333.60 > 1130.62 | 125               | 52                |
| Gb4_C24:2                                         | N-omega-CD3-Octadecanoyl-ceramide trihexoside     | 1357.62 > 1154.64 | 125               | 52                |
| Gb4_C24:1                                         | N-omega-CD3-Octadecanoyl-ceramide trihexoside     | 1359.63 > 1156.66 | 125               | 52                |
| Gb4_C24:0                                         | N-omega-CD3-Octadecanoyl-ceramide trihexoside     | 1361.65 > 1158.67 | 125               | 52                |
| Gb4_C24:2-OH                                      | N-omega-CD3-Octadecanoyl-ceramide trihexoside     | 1373.61 > 1170.63 | 125               | 52                |
| Gb4_C24:1-OH                                      | N-omega-CD3-Octadecanoyl-ceramide trihexoside     | 1375.63 > 1172.65 | 125               | 52                |
| Gb4_C24:0-OH                                      | N-omega-CD3-Octadecanoyl-ceramide trihexoside     | 1377.64 > 1174.67 | 125               | 52                |
| Gb4_C26:1                                         | N-omega-CD3-Octadecanoyl-ceramide trihexoside     | 1387.69 > 1184.71 | 125               | 52                |
| Gb4_C26:0                                         | N-omega-CD3-Octadecanoyl-ceramide trihexoside     | 1389.70 > 1186.72 | 125               | 52                |
|                                                   |                                                   |                   |                   |                   |
| <b>Run 2</b>                                      |                                                   |                   |                   |                   |
| <b>Compound</b>                                   | <b>Internal Standard</b>                          | <b>Transition</b> | <b>Cone Volt.</b> | <b>Col.Energy</b> |
| Lyso SM -28                                       | <sup>13</sup> C <sub>6</sub> Glucosyl-sphingosine | 437.60 > 184.07   | 52                | 20                |
| Lyso SM -12                                       | <sup>13</sup> C <sub>6</sub> Glucosyl-sphingosine | 453.66 > 184.07   | 52                | 20                |
| Lyso SM -2                                        | <sup>13</sup> C <sub>6</sub> Glucosyl-sphingosine | 463.61 > 184.07   | 52                | 20                |
| Lyso SM                                           | <sup>13</sup> C <sub>6</sub> Glucosyl-sphingosine | 465.63 > 184.07   | 52                | 20                |
| Lyso SM                                           | <sup>13</sup> C <sub>6</sub> Glucosyl-sphingosine | 465.63 > 264.35   | 52                | 20                |
| <sup>13</sup> C <sub>6</sub> Glucosyl-sphingosine | n/a                                               | 468.41 > 264.35   | 92                | 20                |
| <sup>13</sup> C <sub>6</sub> Glucosyl-sphingosine | n/a                                               | 468.41 > 282.36   | 92                | 20                |
| Lyso SM 14                                        | <sup>13</sup> C <sub>6</sub> Glucosyl-sphingosine | 479.62 > 184.07   | 52                | 20                |
| Lyso SM 16                                        | <sup>13</sup> C <sub>6</sub> Glucosyl-sphingosine | 481.62 > 184.07   | 52                | 20                |
| Lyso SM 34                                        | <sup>13</sup> C <sub>6</sub> Glucosyl-sphingosine | 499.64 > 184.07   | 52                | 20                |
| Lyso SM 50                                        | <sup>13</sup> C <sub>6</sub> Glucosyl-sphingosine | 515.62 > 332.56   | 52                | 20                |
| Lyso-Gb3-28                                       | N-Glycinated lyso-ceramide trihexoside            | 758.37 > 236.32   | 72                | 22                |
| Lyso-Gb3-12                                       | N-Glycinated lyso-ceramide trihexoside            | 774.44 > 252.38   | 72                | 22                |
| Lyso-Gb3-2                                        | N-Glycinated lyso-ceramide trihexoside            | 784.39 > 262.33   | 72                | 22                |
| Lyso-Gb3                                          | N-Glycinated lyso-ceramide trihexoside            | 786.41 > 264.35   | 72                | 22                |
| Lyso-Gb3                                          | N-Glycinated lyso-ceramide trihexoside            | 786.41 > 282.36   | 72                | 28                |
| Lyso-Gb3+14                                       | N-Glycinated lyso-ceramide trihexoside            | 800.40 > 278.34   | 72                | 22                |
| Lyso-Gb3+16                                       | N-Glycinated lyso-ceramide trihexoside            | 802.40 > 280.34   | 72                | 22                |

| Lyso-Gb3+34                                   | N-Glycinated lyso-ceramide trihexoside            | 820.41 > 298.36  | 72         | 22         |
|-----------------------------------------------|---------------------------------------------------|------------------|------------|------------|
| Lyso-Gb3+50                                   | N-Glycinated lyso-ceramide trihexoside            | 836.40 > 314.34  | 72         | 22         |
| N-Glycinated lyso-ceramide trihexoside        | n/a                                               | 843.64 > 264.43  | 48         | 48         |
| N-Glycinated lyso-ceramide trihexoside        | n/a                                               | 843.64 > 339.45  | 48         | 26         |
| Compound                                      | Internal Standard                                 | Transition       | Cone Volt. | Col.Energy |
| Lyso SM 509                                   | <sup>13</sup> C <sub>6</sub> Glucosyl-sphingosine | 509.39 > 184.07  | 52         | 30         |
| Lyso SM 509                                   | <sup>13</sup> C <sub>6</sub> Glucosyl-sphingosine | 509.39 > 326.33  | 52         | 20         |
| CDH_C16:1                                     | N-omega-CD3-Octadecanoyl-ceramide trihexoside     | 882.22 > 720.25  | 124        | 57         |
| CDH_C16:0                                     | N-omega-CD3-Octadecanoyl-ceramide trihexoside     | 884.24 > 722.27  | 124        | 57         |
| CDH_C18:1                                     | N-omega-CD3-Octadecanoyl-ceramide trihexoside     | 910.27 > 748.30  | 124        | 57         |
| CDH_C18:0                                     | N-omega-CD3-Octadecanoyl-ceramide trihexoside     | 912.29 > 750.32  | 124        | 57         |
| CDH_C20:1                                     | N-omega-CD3-Octadecanoyl-ceramide trihexoside     | 938.33 > 776.36  | 124        | 57         |
| CDH_C20:0                                     | N-omega-CD3-Octadecanoyl-ceramide trihexoside     | 940.34 > 778.37  | 124        | 57         |
| CDH_C22:1                                     | N-omega-CD3-Octadecanoyl-ceramide trihexoside     | 966.38 > 804.41  | 124        | 57         |
| CDH_C22:0                                     | N-omega-CD3-Octadecanoyl-ceramide trihexoside     | 968.40 > 806.43  | 124        | 57         |
| CDH_C24:3                                     | N-omega-CD3-Octadecanoyl-ceramide trihexoside     | 990.40 > 828.43  | 124        | 57         |
| CDH_C24:2                                     | N-omega-CD3-Octadecanoyl-ceramide trihexoside     | 992.42 > 830.45  | 124        | 57         |
| CDH_C24:1                                     | N-omega-CD3-Octadecanoyl-ceramide trihexoside     | 994.43 > 832.46  | 124        | 57         |
| CDH_C24:0                                     | N-omega-CD3-Octadecanoyl-ceramide trihexoside     | 996.45 > 834.48  | 124        | 57         |
| CDH_C24:3 -OH                                 | N-omega-CD3-Octadecanoyl-ceramide trihexoside     | 1006.40 > 844.43 | 124        | 57         |
| CDH_C24:2-OH                                  | N-omega-CD3-Octadecanoyl-ceramide trihexoside     | 1008.41 > 846.44 | 124        | 57         |
| CDH_C24:1-OH                                  | N-omega-CD3-Octadecanoyl-ceramide trihexoside     | 1010.43 > 848.46 | 124        | 57         |
| CDH_C24:0-OH                                  | N-omega-CD3-Octadecanoyl-ceramide trihexoside     | 1012.44 > 850.47 | 124        | 57         |
| CDH_C26:3                                     | N-omega-CD3-Octadecanoyl-ceramide trihexoside     | 1018.46 > 856.48 | 124        | 57         |
| CDH_C26:2                                     | N-omega-CD3-Octadecanoyl-ceramide trihexoside     | 1020.47 > 858.50 | 124        | 57         |
| CDH_C26:1                                     | N-omega-CD3-Octadecanoyl-ceramide trihexoside     | 1022.49 > 860.52 | 124        | 57         |
| CDH_C26:0                                     | N-omega-CD3-Octadecanoyl-ceramide trihexoside     | 1024.50 > 862.53 | 124        | 57         |
| CDH_C26:3 -OH                                 | N-omega-CD3-Octadecanoyl-ceramide trihexoside     | 1034.45 > 872.48 | 124        | 57         |
| CDH_C26:2-OH                                  | N-omega-CD3-Octadecanoyl-ceramide trihexoside     | 1036.46 > 874.49 | 124        | 57         |
| CDH_C26:1-OH                                  | N-omega-CD3-Octadecanoyl-ceramide trihexoside     | 1038.48 > 876.51 | 124        | 57         |
| CDH_C26:0-OH                                  | N-omega-CD3-Octadecanoyl-ceramide trihexoside     | 1040.50 > 878.53 | 124        | 57         |
| N-omega-CD3-Octadecanoyl-ceramide trihexoside | n/a                                               | 1077.84 > 915.91 | 108        | 56         |
|                                               |                                                   |                  |            |            |
| <b>Run 3</b>                                  |                                                   |                  |            |            |

| Compound                                      | Internal Standard                             | Transition        | Cone Volt. | Col.Energy |
|-----------------------------------------------|-----------------------------------------------|-------------------|------------|------------|
| SM_C16:1                                      | N-Heptadecanoyl-sphingophosphorylcholine      | 723.43 > 540.41   | 90         | 40         |
| SM_C16:0                                      | N-Heptadecanoyl-sphingophosphorylcholine      | 725.44 > 542.43   | 90         | 40         |
| N-Heptadecanoyl-sphingophosphorylcholine      | n/a                                           | 739.46 > 556.44   | 90         | 40         |
| SM_C18:1                                      | N-Heptadecanoyl-sphingophosphorylcholine      | 751.46 > 568.44   | 90         | 40         |
| SM_C18:0                                      | N-Heptadecanoyl-sphingophosphorylcholine      | 753.48 > 570.46   | 90         | 40         |
| SM_C20:1                                      | N-Heptadecanoyl-sphingophosphorylcholine      | 779.49 > 596.47   | 90         | 40         |
| SM_C20:0                                      | N-Heptadecanoyl-sphingophosphorylcholine      | 781.51 > 598.49   | 90         | 40         |
| SM_C22:1                                      | N-Heptadecanoyl-sphingophosphorylcholine      | 807.52 > 624.51   | 90         | 45         |
| SM_C22:0                                      | N-Heptadecanoyl-sphingophosphorylcholine      | 809.54 > 626.52   | 90         | 45         |
| SM_C24:2                                      | N-Heptadecanoyl-sphingophosphorylcholine      | 833.54 > 650.52   | 90         | 45         |
| SM_C24:1                                      | N-Heptadecanoyl-sphingophosphorylcholine      | 835.55 > 652.54   | 90         | 45         |
| SM_C24:0                                      | N-Heptadecanoyl-sphingophosphorylcholine      | 837.57 > 654.55   | 90         | 45         |
| SM_C26:0                                      | N-Heptadecanoyl-sphingophosphorylcholine      | 865.60 > 682.58   | 90         | 45         |
| Gb3_C16:0                                     | N-omega-CD3-Octadecanoyl-ceramide trihexoside | 1046.63 > 884.66  | 124        | 64         |
| Gb3_C18:0                                     | N-omega-CD3-Octadecanoyl-ceramide trihexoside | 1074.68 > 912.71  | 124        | 64         |
| N-omega-CD3-Octadecanoyl-ceramide trihexoside | n/a                                           | 1077.84 > 915.91  | 108        | 56         |
| Gb3_C20:0                                     | N-omega-CD3-Octadecanoyl-ceramide trihexoside | 1102.74 > 940.77  | 124        | 64         |
| Gb3_C22:1                                     | N-omega-CD3-Octadecanoyl-ceramide trihexoside | 1128.77 > 966.80  | 124        | 64         |
| Gb3_C22:0                                     | N-omega-CD3-Octadecanoyl-ceramide trihexoside | 1130.79 > 968.82  | 124        | 64         |
| Gb3_C24:2                                     | N-omega-CD3-Octadecanoyl-ceramide trihexoside | 1154.81 > 992.84  | 124        | 64         |
| Gb3_C24:1                                     | N-omega-CD3-Octadecanoyl-ceramide trihexoside | 1156.83 > 994.86  | 124        | 64         |
| Gb3_C24:0                                     | N-omega-CD3-Octadecanoyl-ceramide trihexoside | 1158.84 > 996.87  | 124        | 64         |
| Gb3_C24:2-OH                                  | N-omega-CD3-Octadecanoyl-ceramide trihexoside | 1170.81 > 1008.84 | 124        | 64         |
| Gb3_C24:1-OH                                  | N-omega-CD3-Octadecanoyl-ceramide trihexoside | 1172.82 > 1010.85 | 124        | 64         |
| Gb3_C24:0-OH                                  | N-omega-CD3-Octadecanoyl-ceramide trihexoside | 1174.84 > 1012.87 | 124        | 64         |
| Gb3_C26:0                                     | N-omega-CD3-Octadecanoyl-ceramide trihexoside | 1186.90 > 1024.93 | 124        | 64         |
|                                               |                                               |                   |            |            |
